# Supplementary material for: Innovative mouse model mimicking human-like features of spinal cord injury: efficacy of Docosahexaenoic acid on acute and chronic phases
Source: PubMed Central journal article supplement (PMC6586623; doi:10.1038/s41598-019-45037-x), 2019-06-20
Supplement: 41598_2019_45037_MOESM1_ESM.pdf [file 41598_2019_45037_MOESM1_ESM.pdf]

## **Innovative mouse model mimicking human-like features of spinal cord injury: efficacy of Docosahexaenoic acid on acute and chronic phases.**

Sara Marinelli<sup>1,2</sup>, Valentina Vacca<sup>1,2</sup>, Federica De Angelis<sup>2</sup>, Luisa Pieroni<sup>2</sup>, Tiziana Orsini<sup>1</sup>, Chiara Parisi<sup>1</sup>, Marzia Soligo<sup>3</sup>, Virginia Protto<sup>3</sup>, Luigi Manni<sup>3</sup>, Roberto Guerrieri<sup>4</sup>, Flaminia Pavone<sup>1,2\*</sup>

00015 Monterotondo Scalo

<sup>1</sup> CNR - National Research Council, Institute of Cell Biology and Neurobiology, ~~00143 Roma~~, Italy.

<sup>2</sup> IRCCS - Santa Lucia Foundation, 00143 Roma, Italy

<sup>3</sup> CNR - National Research Council, Institute of Translational Pharmacology, 00133 Roma, Italy.

<sup>4</sup> Department of Electrical, Electronic, and Information Engineering «Guglielmo Marconi», University of Bologna, 40136 Bologna, Italy

\* To whom correspondence should be addressed: CNR – National Research Council, Institute of Cell Biology and Neurobiology, Via ~~Vesio di Fiorano 64, Roma 00143~~, Italy. Tel.: +39 06 50170 3189

### **Supplementary Information:**

**Supplementary Table S1:** Cortical PinPoint Impactor parameters.

**Supplementary Fig. S1:** BMS scores and thermal threshold in female and male SCI mice

**Supplementary Fig. S2:** Behavioural and immunohistochemical analyses in sham female animals treated with saline or DHA.

**Supplementary Table S2:** Shotgun Proteomics

**Supplementary Fig. S3:** Bioinformatic analysis

**Supplementary Fig. S4:** WB analyses of p75, pJNK and JNK

**Supplementary Table S3:** Number of mice used in the SCI model

**Supplementary Table S4:** List of antibodies

**Supplementary Table S1: Cortical PinPoint Impactor parameters corresponding to different degrees of SCI.**

|          | TIPS      | DWELL TIME  | VELOCITY | DEPTH    |
|----------|-----------|-------------|----------|----------|
| MILD     | Round 1-2 | 300/500 ms  | 3 m/sec  | 2,5-3 mm |
| MODERATE | Round 3   | 500/600 ms  | 3 m/sec  | 3,5-5 mm |
| SEVERE   | Round 4   | 600/1000 ms | 3 m/sec  | 5 mm     |

**Supplementary Figure S1: (A) BMS scores and (B) thermal threshold measured in Tail-Flick test in female and male SCI mice (F and M respectively, n=8/each group) before (BL) and after a severe spinal trauma. Differently from females male mice gradually recovered after SCI.**

**A**

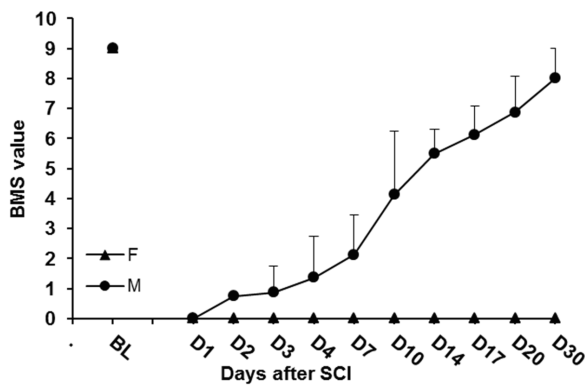

**B**

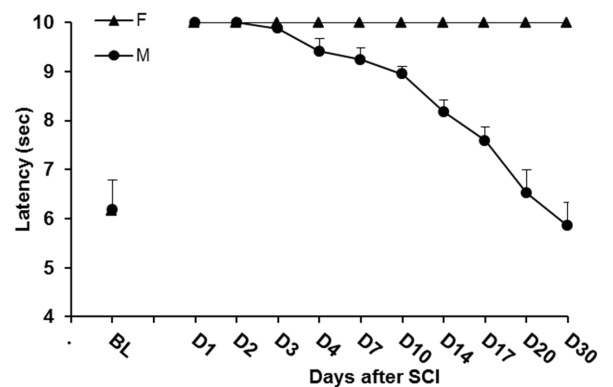

**Supplementary Figure S2:** Behavioural and immunohistochemical analyses in sham female animals treated with saline- (SAL) or DHA and compared with naïve mice. **(A)** BMS scores and **(B)** thermal threshold measured in Tail-Flick test in naïve (BL), SAL- and DHA-treated sham mice **(C)** Representative examples of high magnification (63x, zoom 2x) confocal images of astrocytes (GFAP, green) and microglia (IBA1, red). In graphs the dimension of astrocytes and the distribution of the different phenotypes of microglia are represented. In both saline- and DHA-treated sham mice no differences are observed in comparison with naïve animals. **(D)** Representative examples of high magnification (63x, zoom 2x) confocal images of oligodendrocytes (OLIG1, green) and caspase-3 (red). In graphs are reported brightness values of OLIG1 and Caspase-3 expression in ventral horns of spinal cord from naïve, SAL- and DHA-treated mice. In both saline- and DHA-treated sham mice no differences are observed in comparison with naïve animals. DAPI was used to stain nuclei.

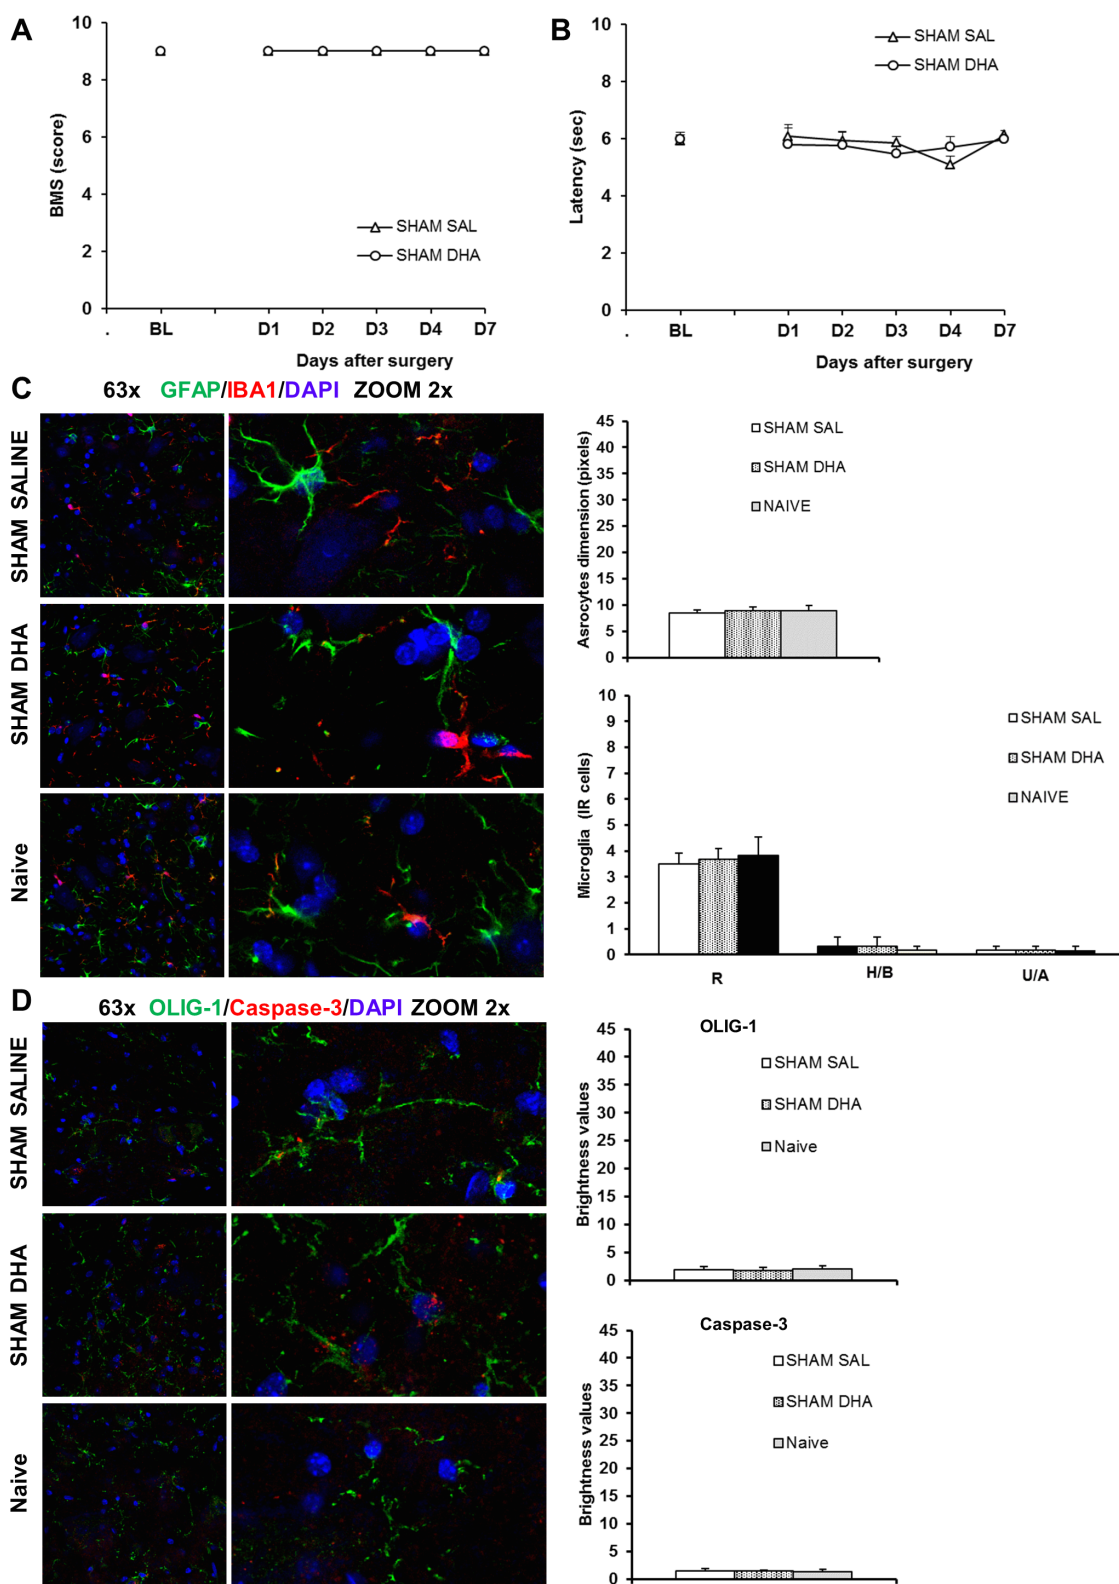

Supplementary Table S2. SHOTGUN PROTEOMICS: Differential Expression Analysis - DHA vs SALINE

(First part)

| Accession* | Description                                                    | Gene Name | Score†   | Unique‡ | DHA: Saline | DHA:Saline<br>_Log(e)Ratio |
|------------|----------------------------------------------------------------|-----------|----------|---------|-------------|----------------------------|
| Accession* | Description                                                    | Gene Name | Score    | Unique  | DHA         | DHA2                       |
| Q60932     | Voltage-dependent anion-selective channel protein 1            | Vdac1     | 949,08   | DHA     | DHA         | DHA                        |
| P26645     | Myristoylated alanine-rich C-kinase substrate                  | Marcks    | 567,62   | DHA     | DHA         | DHA                        |
| P50518     | V-type proton ATPase subunit E 1                               | Atp6v1e1  | 387,9    | DHA     | DHA         | DHA                        |
| Q9WV92     | Band 4.1-like protein 3                                        | Epb4113   | 375,98   | DHA     | DHA         | DHA                        |
| Q6P8J7     | Creatine kinase S-type_mitochondrial                           | Ckmt2     | 987,49   |         | 2,18        | 0,78                       |
| Q91Z23     | Beta-synuclein                                                 | Sncb      | 6237,11  |         | 2,08        | 0,73                       |
| P09041     | Phosphoglycerate kinase 2                                      | Pgk2      | 1446,45  |         | 1,93        | 0,66                       |
| Q9CRB6     | Tubulin polymerization-promoting protein family member 3       | Tppp3     | 2254,76  |         | 1,80        | 0,59                       |
| Q91V12     | Cytosolic acyl coenzyme A thioester hydrolase                  | Acot7     | 809,99   |         | 1,80        | 0,59                       |
| O88935     | Synapsin-1                                                     | Syn1      | 1864,8   |         | 1,77        | 0,57                       |
| O08553     | Dihydropyrimidinase-related protein 2                          | Dpysl2    | 23417,02 |         | 1,72        | 0,54                       |
| P09411     | Phosphoglycerate kinase 1                                      | Pgk1      | 4803,99  |         | 1,68        | 0,52                       |
| Q9Z0F7     | Gamma-synuclein                                                | Sncg      | 474,84   |         | 1,67        | 0,51                       |
| P08249     | Malate dehydrogenase_mitochondrial                             | Mdh2      | 18052,8  |         | 1,65        | 0,50                       |
| Q7TQD2     | Tubulin polymerization-promoting protein                       | Tppp      | 1554,69  |         | 1,63        | 0,49                       |
| Q8QZT1     | Acetyl-CoA acetyltransferase_mitochondrial                     | Acat1     | 874,11   |         | 1,63        | 0,49                       |
| Q62188     | Dihydropyrimidinase-related protein 3                          | Dpysl3    | 6804     |         | 1,62        | 0,48                       |
| P17183     | Gamma-enolase                                                  | Eno2      | 10918,73 |         | 1,62        | 0,48                       |
| Q9D3D9     | ATP synthase subunit delta_mitochondrial                       | Atp5d     | 3675,04  |         | 1,62        | 0,48                       |
| P09671     | Superoxide dismutase [Mn]_mitochondrial                        | Sod2      | 4153,61  |         | 1,58        | 0,46                       |
| Q01853     | Transitional endoplasmic reticulum ATPase                      | Vcp       | 1012     |         | 1,58        | 0,46                       |
| P50114     | Protein S100-B                                                 | S100b     | 2457,25  |         | 1,57        | 0,45                       |
| O55042     | Alpha-synuclein                                                | Snca      | 2544,23  |         | 1,55        | 0,44                       |
| P17742     | Peptidyl-prolyl cis-trans isomerase A                          | Ppia      | 4620,59  |         | 1,54        | 0,43                       |
| Q9DCX2     | ATP synthase subunit d_mitochondrial                           | Atp5h     | 2877,1   |         | 1,52        | 0,42                       |
| Q99PT1     | Rho GDP-dissociation inhibitor 1                               | Arhgdia   | 2683,34  |         | 1,52        | 0,42                       |
| P20108     | Thioredoxin-dependent peroxide reductase_mitochondrial         | Prdx3     | 1010,04  |         | 1,52        | 0,42                       |
| P04370     | Myelin basic protein                                           | Mbp       | 22546,15 |         | 1,51        | 0,41                       |
| P30275     | Creatine kinase U-type_mitochondrial                           | Ckmt1     | 1436,43  |         | 1,49        | 0,40                       |
| Q8K183     | Pyridoxal kinase                                               | Pdxk      | 709,07   |         | 1,49        | 0,40                       |
| Q9ERD7     | Tubulin beta-3 chain                                           | Tubb3     | 11546,31 |         | 1,49        | 0,40                       |
| P56480     | ATP synthase subunit beta_mitochondrial                        | Atp5b     | 5201,2   |         | 1,49        | 0,40                       |
| P63038     | 60 kDa heat shock protein_mitochondrial                        | Hspd1     | 2930,97  |         | 1,48        | 0,39                       |
| A2AQ07     | Tubulin beta-1 chain                                           | Tubb1     | 895,9    |         | 1,48        | 0,39                       |
| P21550     | Beta-enolase                                                   | Eno3      | 5534,3   |         | 1,48        | 0,39                       |
| P52760     | Ribonuclease UK114                                             | Hrsp12    | 2664,1   |         | 1,46        | 0,38                       |
| P05202     | Aspartate aminotransferase_mitochondrial                       | Got2      | 3902,15  |         | 1,46        | 0,38                       |
| P05064     | Fructose-bisphosphate aldolase A                               | Aldoa     | 12259,89 |         | 1,46        | 0,38                       |
| P99029     | Peroxiredoxin-5_mitochondrial                                  | Prdx5     | 3426,36  |         | 1,46        | 0,38                       |
| Q8BWF0     | Succinate-semialdehyde dehydrogenase_mitochondrial             | Aldh5a1   | 785,05   |         | 1,45        | 0,37                       |
| Q61171     | Peroxiredoxin-2                                                | Prdx2     | 3029,51  |         | 1,43        | 0,36                       |
| P17751     | Triosephosphate isomerase                                      | Tpi1      | 7191,61  |         | 1,43        | 0,36                       |
| P15105     | Glutamine synthetase                                           | Glul      | 1595,69  |         | 1,43        | 0,36                       |
| P02104     | Hemoglobin subunit epsilon-Y2                                  | Hbb-y     | 507,87   |         | 1,42        | 0,35                       |
| Q04447     | Creatine kinase B-type                                         | Ckb       | 7814,9   |         | 1,42        | 0,35                       |
| P97427     | Dihydropyrimidinase-related protein 1                          | Crmp1     | 6625,2   |         | 1,39        | 0,33                       |
| P05063     | Fructose-bisphosphate aldolase C                               | Aldoc     | 14216,55 |         | 1,39        | 0,33                       |
| Q9R0Y5     | Adenylate kinase isoenzyme 1                                   | Ak1       | 1038,8   |         | 1,38        | 0,32                       |
| Q9D051     | Pyruvate dehydrogenase E1 component subunit beta_mitochondrial | Pdhb      | 1095,84  |         | 1,38        | 0,32                       |
| P62204     | Calmodulin                                                     | Calm1     | 12784,71 |         | 1,38        | 0,32                       |
| Q9DB20     | ATP synthase subunit O_mitochondrial                           | Atp5o     | 2931,77  |         | 1,38        | 0,32                       |
| Q9DBJ1     | Phosphoglycerate mutase 1                                      | Pgam1     | 5153,55  |         | 1,38        | 0,32                       |
| P10637     | Microtubule-associated protein tau                             | Mapt      | 502,66   |         | 1,36        | 0,31                       |
| P70296     | Phosphatidylethanolamine-binding protein 1                     | Pebp1     | 1977,02  |         | 1,36        | 0,31                       |
| Q8BH95     | Enoyl-CoA hydratase_mitochondrial                              | Echs1     | 879,08   |         | 1,36        | 0,31                       |
| P16858     | Glyceraldehyde-3-phosphate dehydrogenase                       | Gapdh     | 30204,52 |         | 1,35        | 0,30                       |

(Table S2 second part)

| Accession* | Description                                             | Gene Name | Score†   | Unique‡ | DHA: Saline | DHA:Saline Log(e)Ratio |
|------------|---------------------------------------------------------|-----------|----------|---------|-------------|------------------------|
| Accession* | Description                                             | Gene Name | Score    | Unique  | DHA         | DHA2                   |
| O70456     | 14-3-3 protein sigma                                    | Sfn       | 398,91   |         | 0,74        | -0,30                  |
| P07901     | Heat shock protein HSP 90-alpha                         | Hsp90aa1  | 777,96   |         | 0,70        | -0,35                  |
| P50396     | Rab GDP dissociation inhibitor alpha                    | Gdi1      | 1055,29  |         | 0,70        | -0,36                  |
| Q61598     | Rab GDP dissociation inhibitor beta                     | Gdi2      | 515,58   |         | 0,67        | -0,40                  |
| P62259     | 14-3-3 protein epsilon                                  | Ywhae     | 1722,86  |         | 0,67        | -0,40                  |
| P16330     | 2'-3'-cyclic-nucleotide 3'-phosphodiesterase            | Cnp       | 15261,35 |         | 0,64        | -0,45                  |
| Q9Z1W8     | Potassium-transporting ATPase alpha chain 2             | Atp12a    | 484,54   |         | 0,64        | -0,45                  |
| Q9CZU6     | Citrate synthase_mitochondrial                          | Cs        | 859,63   |         | 0,59        | -0,52                  |
| P11499     | Heat shock protein HSP 90-beta                          | Hsp90ab1  | 841,15   |         | 0,58        | -0,54                  |
| Q8VDN2     | Sodium/potassium-transporting ATPase subunit alpha-1    | Atp1a1    | 905,94   |         | 0,53        | -0,63                  |
| Q6PIC6     | Sodium/potassium-transporting ATPase subunit alpha-3    | Atp1a3    | 1404,93  |         | 0,52        | -0,65                  |
| Q6PIE5     | Sodium/potassium-transporting ATPase subunit alpha-2    | Atp1a2    | 1215,46  |         | 0,51        | -0,67                  |
| Q61885     | Myelin-oligodendrocyte glycoprotein                     | Mog       | 1645,66  |         | 0,50        | -0,70                  |
| Q8VDQ8     | NAD-dependent protein deacetylase sirtuin-2             | Sirt2     | 410,84   |         | 0,47        | -0,75                  |
| P48962     | ADP/ATP translocase 1                                   | Slc25a4   | 565,74   |         | 0,47        | -0,76                  |
| POCG50     | Polyubiquitin-C                                         | Ubc       | 3502,35  |         | 0,44        | -0,82                  |
| P14094     | Sodium/potassium-transporting ATPase subunit beta-1     | Atp1b1    | 893,95   |         | 0,44        | -0,82                  |
| POCG49     | Polyubiquitin-B                                         | Ubb       | 3502,35  |         | 0,44        | -0,83                  |
| P62984     | Ubiquitin-60S ribosomal protein L40                     | Uba52     | 3502,35  |         | 0,44        | -0,83                  |
| P62983     | Ubiquitin-40S ribosomal protein S27a                    | Rps27a    | 3502,35  |         | 0,44        | -0,83                  |
| P07724     | Serum albumin                                           | Alb       | 5304,23  |         | 0,39        | -0,95                  |
| P60202     | Myelin proteolipid protein                              | Plp1      | 9752,25  |         | 0,21        | -1,56                  |
| P18872     | Guanine nucleotide-binding protein G(o) subunit alpha   | Gnao1     | 564,5    | Saline  | Saline      |                        |
| P14231     | Sodium/potassium-transporting ATPase subunit beta-2     | Atp1b2    | 888,79   | Saline  | Saline      |                        |
| Q68FL4     | Putative adenosylhomocysteinase 3                       | Ahcyl2    | 518,95   | Saline  | Saline      |                        |
| P14211     | Calreticulin                                            | Calr      | 826,25   | Saline  | Saline      |                        |
| Q60930     | Voltage-dependent anion-selective channel protein 2     | Vdac2     | 416,78   | Saline  | Saline      |                        |
| P63001     | Ras-related C3 botulinum toxin substrate 1              | Rac1      | 1923,89  | Saline  | Saline      |                        |
| Q9CZT8     | Ras-related protein Rab-3B                              | Rab3b     | 726,65   | Saline  | Saline      |                        |
| P61979     | Heterogeneous nuclear ribonucleoprotein K               | Hnrnpk    | 484,44   | Saline  | Saline      |                        |
| Q9QYG0     | Protein NDRG2                                           | Nrdg2     | 532,43   | Saline  | Saline      |                        |
| P43006     | Excitatory amino acid transporter 2                     | Slc1a2    | 851,79   | Saline  | Saline      |                        |
| P17710     | Hexokinase-1                                            | Hk1       | 503,87   | Saline  | Saline      |                        |
| Q9D1G1     | Ras-related protein Rab-1B                              | Rab1b     | 764,68   | Saline  | Saline      |                        |
| Q05144     | Ras-related C3 botulinum toxin substrate 2              | Rac2      | 1736,33  | Saline  | Saline      |                        |
| Q6PHN9     | Ras-related protein Rab-35                              | Rab35     | 584,72   | Saline  | Saline      |                        |
| Q921I1     | Serotransferrin                                         | Tf        | 1177,77  | Saline  | Saline      |                        |
| Q80W21     | Glutathione S-transferase Mu 7                          | Gstm7     | 562,85   | Saline  | Saline      |                        |
| Q8R527     | Rho-related GTP-binding protein RhoQ                    | Rhoq      | 705,04   | Saline  | Saline      |                        |
| Q3UX10     | Tubulin alpha chain-like 3                              | Tubal3    | 570,79   | Saline  | Saline      |                        |
| P60766     | Cell division control protein 42 homolog                | Cdc42     | 732,17   | Saline  | Saline      |                        |
| P60764     | Ras-related C3 botulinum toxin substrate 3              | Rac3      | 1580,35  | Saline  | Saline      |                        |
| P13707     | Glycerol-3-phosphate dehydrogenase [NAD(+)]_cytoplasmic | Gpd1      | 444,28   | Saline  | Saline      |                        |
| P61028     | Ras-related protein Rab-8B                              | Rab8b     | 510,17   | Saline  | Saline      |                        |
| P61027     | Ras-related protein Rab-10                              | Rab10     | 1171,43  | Saline  | Saline      |                        |
| Q9ER71     | Rho-related GTP-binding protein RhoJ                    | Rhoj      | 705,04   | Saline  | Saline      |                        |
| P84096     | Rho-related GTP-binding protein RhoG                    | Rhog      | 705,04   | Saline  | Saline      |                        |
| P55258     | Ras-related protein Rab-8A                              | Rab8a     | 510,17   | Saline  | Saline      |                        |
| P62823     | Ras-related protein Rab-3C                              | Rab3c     | 726,65   | Saline  | Saline      |                        |
| P62821     | Ras-related protein Rab-1A                              | Rab1A     | 510,17   | Saline  | Saline      |                        |
| P08553     | Neurofilament medium polypeptide                        | Nefm      | 763,84   | Saline  | Saline      |                        |
| P08551     | Neurofilament light polypeptide                         | Nefl      | 582,68   | Saline  | Saline      |                        |
| Q80SW1     | Putative adenosylhomocysteinase 2                       | Ahcyl1    | 563,85   | Saline  | Saline      |                        |

- \* Unique protein sequence identifier according to UniProtKB/Swiss-Prot Protein Knowledgebase, release 2016\_09, October-05,2016 restricted to Mouse Taxonomy
- † ProteinLynx Global Server score.
- ‡ Protein found highly represented in the indicated group.



4. § Ratio of expression between two experimental groups.

**Supplementary Figure S3:** Bioinformatic analysis. Graphical representation predicted by Ingenuity Pathways Analysis (IPA, QIAGEN Inc., <https://www.qiagenbioinformatics.com/products/ingenuitypathway-analysis>) of the in out dataset (DHA vs SALINE). The relationships between molecules revealed by proteomics (described in Table 2) and other proteins are generated by the information contained onto a global molecular network enclosed in the Ingenuity Knowledge Base database.

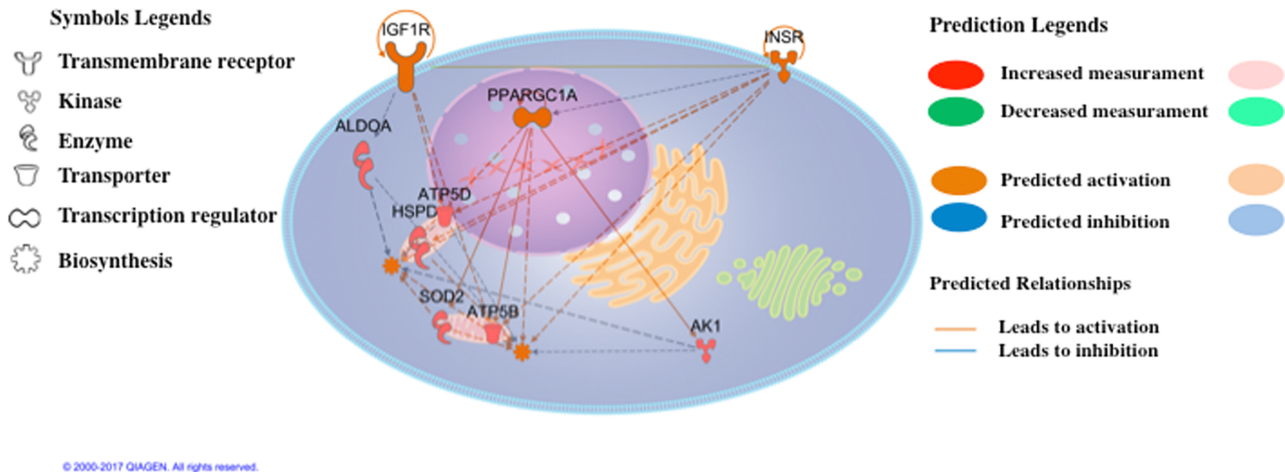

**Supplementary Figure S4:** WB analyses of **A)** p75 and **B)** pJNK and JNK, proteins involved in apoptotic pathway, in spinal tissues from naïve (N), saline- (S) and DHA-treated mice, analysed at the epicenter (E), peri-lesioned (P) and distal (D) areas. Both p75<sup>NTR</sup> and phosphorylated (p)-JNK were increased after SCI in the three spinal levels examined and were down-regulated by DHA °° p<0.001 °°°p<0.0001 vs naïve; \*\* p<0.001 vs SAL.

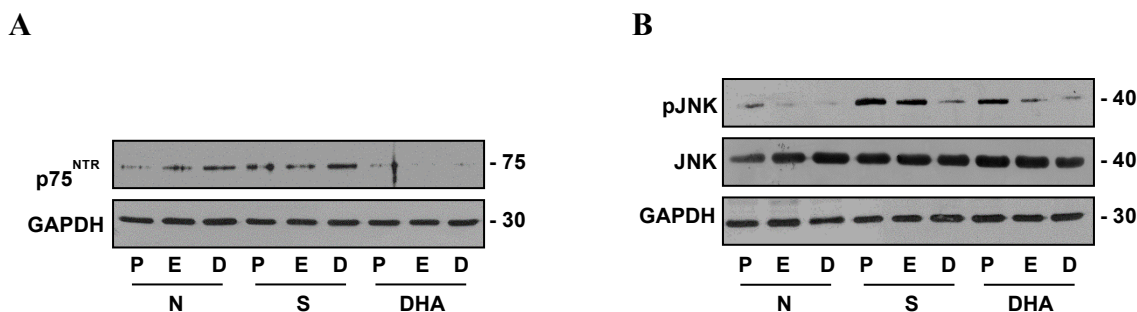

**Methods.** Western blot analysis was performed on tissue samples from different experimental groups. Tissue samples were homogenized in RIPA buffer, centrifuged at 4° C for 20 min at 13000 rpm, and then supernatants were stored at -20°C. 30µg of total protein spinal cord samples corresponding to T9-T11 (epicenter, E), T6-T8 (peri-lesioned, P) and L1-L3 (distal, D) were separated by 8% or 12% SDS-PAGE, and electrophoretically transferred to PVDF membrane overnight. Membranes were incubated overnight at 4°C with the following primary antibodies anti-p75<sup>NTR</sup> (Santa Cruz Biotechnology Cat# sc-53631, RRID:AB\_784824); anti-GAPDH (Santa Cruz Biotechnology Cat# sc-25778, RRID:AB\_10167668); anti-phospho-JNK (Cell Signaling Technology Cat# 9255, RRID:AB\_2307321) and anti-JNK (Cell Signaling Technology Cat# 3708, RRID:AB\_1904132). Horseradish peroxidase (HRP)-conjugated anti-rabbit or HRP-conjugated anti-mouse IgG was used as secondary antibody (Cell Signaling Technology). The blots were

developed with the enhanced chemiluminescence (ECL) detection system (WBKLS0500, Millipore). The GAPDH bands were used as a control for equal protein loading.

**Supplementary Table S3: Number of mice used in the SCI model.** In brackets is reported the number of dead mice. The severity of spinal cord injury drastically influenced the survival of mice after surgery: mild and moderate (Mod) contusion did not cause death, while severe (Sev) contusion induced death within 24h in about \_\_\_\_\_ 44% \_\_\_\_\_ of \_\_\_\_\_ mice.

| Treatment          | Saline |       |         | DHA   |         |
|--------------------|--------|-------|---------|-------|---------|
| Contusion severity | Mild   | Mod   | Sev     | Mild  | Sev     |
| EXPERIMENTS:       |        |       |         |       |         |
| BMS and TF         | 5 (0)  | 5 (0) | 18 (7)  | 4 (0) | 18 (10) |
| IF                 | -      | -     | 5 (2)   | -     | 5 (2)   |
| WB                 | -      | -     | 5 (2)   | -     | 5 (2)   |
| TOTAL              | 5 (0)  | 5 (0) | 28 (11) | 4 (0) | 28 (14) |

**Supplementary Table S4: List of antibodies**

|                 | ANTIBODIES         |       |                        |                            |
|-----------------|--------------------|-------|------------------------|----------------------------|
| PRIMARY         | SPECIES            |       | PRODUCT                | MARKER                     |
| NeuN            | Mouse monoclonal   | 1:100 | Millipore              | Neurons                    |
| CD11b           | Rat monoclonal     | 1:100 | AbDSerotec             | Microglia/macrophages      |
| GFAP            | Mouse monoclonal   | 1:100 | Sigma-Aldrich          | Astrocytes                 |
| OLIG1           | Mouse monoclonal   | 1:100 | Santa Cruz             | Oligodendrocyte            |
| Caspase-3       | Rabbit polyclonal  | 1:100 | Cell signaling         | apoptosis                  |
| proNGF          | Rabbit polyclonal  | 1:100 | Chemicon               | Pro-regeneration/apoptosis |
| SECONDARY       | SPECIES            |       | PRODUCT                | FLUORESCENCE               |
| Alexa Fluor 488 | Donkey anti- mouse | 1:100 | Jackson ImmunoResearch | Green                      |
| Cy2             | Donkey anti-rat    | 1:100 | Jackson ImmunoResearch | Green                      |
| Rhodamine       | Goat anti-rabbit   | 1:100 | Jackson ImmunoResearch | Red                        |
